# Supplementary material
Source: HighWire-hosted journal article supplement (https://bmjopen.bmj.com/content/15/3/e086412)
Supplement: inline-supplementary-material-1 [file inline-supplementary-material-1.pdf]

## Appendix 1

### Search strategy

#### Ovid (MEDLINE, EMBASE)

- 1 Computer Communication Networks/
- 2 Local Area Networks/
- 3 Internet/
- 4 Internet-Based Intervention/
- 5 ((internet or online or web or web-based or web-site or website or www or cyber\* or smartphone\* or smart phone\* or iphone\* or i-phone\* or ipad or i-pad or ipads or i-pads) adj3 (care or deliver\* or healthcare or health care or consult\* or counsel\* or interven\* or monitor\* or psychiatr\* or rehab\* or service? or treat\* or therap\*)).tw,kf.
- 6 Smartphone/
- 7 ((internet or online or web or web-based or web-site or website or www or cyber\* or smartphone\* or smart phone\* or iphone\* or i-phone\* or ipad or i-pad or ipads or i-pads) adj3 (app or apps or application?)).tw,kf.
- 8 (mobile adj3 (app or apps or application?)).tw,kf.
- 9 (digital\* adj3 (care or healthcare or health care or interven\* or consult\* or counsel\* or monitor\* or psychiatr\* or rehab\* or treat\* or therap\*)).tw,kf.
- 10 ((technology-based or technology-facilitated) adj3 (care or healthcare or health care or interven\* or consult\* or counsel\* or monitor\* or psychiatr\* or rehab\* or treat\* or therap\*)).tw,kf.
- 11 (video\* adj3 (care or healthcare or health care or interven\* or consult\* or counsel\* or monitor\* or psychiatr\* or rehab\* or treat\* or therap\*)).tw,kf.
- 12 Patient Portals/
- 13 (patient? adj2 (portal or portals)).tw,kf.
- 14 ((health information or medical information or clinical information) adj3 (portal or portals)).tw,kf.
- 15 ((health data or medical data or clinical data) adj3 (portal or portals)).tw,kf.
- 16 health portal?.tw,kf.
- 17 Electronic Mail/
- 18 (electronic mail\* or email\* or e-mail\*).tw,kf.
- 19 exp Telephone/
- 20 (telephon\* or tele-phon\* or phone or phoned or phones or phoning or answering service? or telefacsimile\* or tele-facsimile\* or FAX).tw,kf.
- 21 exp Television/
- 22 (televis\* or tele-vis\* or TV or TVs or videorecord\* or video-record\* or videotap\* or video tap\*).tw,kf.
- 23 Videoconferencing/
- 24 (videoconferenc\* or video-conference\* or videophon\* or video-phon\*).tw,kf.
- 25 Electronic Health Records/
- 26 electronic health record?.tw,kf.
- 27 (EHR or EHRs or EMR or EMRs or PHR or PHRs).tw,kf.
- 28 Telecommunications/
- 29 (telecommunicat\* or tele-communicat\*).tw,kf.
- 30 exp Telemedicine/

- 31 Telenursing/
- 32 (ehealth or e-health or mhealth or m-health or mobile health).tw,kf.
- 33 (telecare or tele-care or teleconsult\* or tele-consult\* or telecounsel\* or tele-counsel\* or telehome\* or tele-home\* or telemed\* or tele-med\* or telemonitor\* or tele-monitor\* or telenurs\* or tele-nurs\* or telepsychiatr\* or tele-psychiatr\* or telerehab\* or tele-rehab\*).tw,kf.
- 34 1 or 2 or 3 or 4 or 5 or 6 or 7 or 8 or 9 or 10 or 11 or 12 or 13 or 14 or 15 or 16 or 17 or 18 or 19 or 20 or 21 or 22 or 23 or 24 or 25 or 26 or 27 or 28 or 29 or 30 or 31 or 32 or 33
- 35 exp Medical Informatics Applications/
- 36 medical informatics applications/ or exp decision making, computer-assisted/ or exp decision support techniques/ or exp "information storage and retrieval"/ or exp information systems/ or exp medical informatics computing/
- 37 34 or 35 or 36
- 38 (doctor\* or clinician\* or practitioner\* or health professional\* or health personnel or provider\* or physician\* or GP or GPs or nurs\* or allied health\* or psychologist\* or counsellor\* or counselor\* or social work\* or therapist\* or psychiatrist\* or emergency medical technician\* or paramedic\* or ambulance or ((healthcare or health care) adj2 (worker\* or personnel))))).mp,kw.
- 39 37 and 38
- 40 exp Specialties, Surgical/
- 41 specialties, surgical/ or exp colorectal surgery/ or exp general surgery/ or exp gynecology/ or exp neurosurgery/ or exp obstetrics/ or exp ophthalmology/ or exp orthognathic surgery/ or exp orthopedics/ or exp otolaryngology/ or exp surgery, plastic/ or exp surgical oncology/ or exp thoracic surgery/ or exp traumatology/ or exp urology/
- 42 exp Surgical Procedures, Operative/
- 43 Perioperative Medicine/ or Perioperative Care/ or Perioperative Period/
- 44 Preoperative Care/
- 45 Preoperative Period/
- 46 Postoperative Care/
- 47 Postoperative Period/
- 48 40 or 41 or 42 or 43 or 44 or 45 or 46 or 47
- 49 39 and 48
- 50 (("semi-structured" or semistructured or unstructured or informal or "in-depth" or indepth or "face-to-face" or structured or guide) adj2 (interview\* or discussion\* or questionnaire\*)).tw,kw.
- 51 (focus group\* or qualitative or ethnograph\* or fieldwork or "field work" or "key informant").tw,kw.
- 52 interviews as topic/ or focus groups/ or narration/ or qualitative research/
- 53 (("semi-structured" or semistructured or unstructured or informal or "in-depth" or indepth or "face-to-face" or structured or guide or guides or follow up or self report) adj3 (interview\* or discussion\* or questionnaire\*)).tw.
- 54 (focus group\* or advisory group\* or qualitative or ethnograph\* or fieldwork or field work or key informant or thematic analy\* or grounded theor\* or phenomenolog\* or discourse analy\* or content analy\* or narrative\* or observational method\* or open ended evaluation\* or action research or inductive analy\* or emic or etic or hermeneutic\* or constant compar\* or grounded theor\* or lived experience\* or life experience\* or theoretical sampl\* or purposive sampl\* or quasi-experiment\* or (case adj2 stud\*)).tw.
- 55 50 or 51 or 52 or 53 or 54

56 49 and 55

## CINAHL

- 1 (MM "Computer Communication Networks")
- 2 (MM "Local Area Networks")
- 3 (MM "Internet")
- 4 (MM "Internet-Based Intervention") OR (MM "World Wide Web Applications") OR (MM "World Wide Web")
- 5 "((internet or online or web or web-based or web-site or website or www or cyber\* or smartphone\* or smart phone\* or iphone\* or i-phone\* or ipad or i-pad or ipads or i-pads) N (care or deliver\* or healthcare or health care or consult\* or counsel\* or interven\* or monitor\* or psychiatr\* or rehab\* or service? or treat\* or therap\*))"
- 6 (MM "Smartphone") OR (MM "Mobile Applications") OR (MM "Computers, Hand-Held+") OR (MM "Cellular Phone+") OR (MM "Text Messaging")
- 7 ((internet or online or web or web-based or web-site or website or www or cyber\* or smartphone\* or smart phone\* or iphone\* or i-phone\* or ipad or i-pad or ipads or i-pads) N (app or apps or application?))
- 8 (mobile N (app or apps or application?)).
- 9 (digital\* N (care or healthcare or health care or interven\* or consult\* or counsel\* or monitor\* or psychiatr\* or rehab\* or treat\* or therap\*))
- 10 ((technology-based or technology-facilitated) N (care or healthcare or health care or interven\* or consult\* or counsel\* or monitor\* or psychiatr\* or rehab\* or treat\* or therap\*))
- 11 (video\* N (care or healthcare or health care or interven\* or consult\* or counsel\* or monitor\* or psychiatr\* or rehab\* or treat\* or therap\*))
- 12 (MM "Patient Portals")
- 13 (patient? N (portal or portals))
- 14 ((health information or medical information or clinical information) N (portal or portals))
- 15 (MH "Health Information Systems+") OR (MM "Integrated Advanced Information Management Systems") OR (MM "Management Information Systems") OR (MM "Appointment and Scheduling Information Systems")
- 16 ((health data or medical data or clinical data) N (portal or portals)).
- 17 (MM "Routinely Collected Health Data") OR (MM "Clinical Data Repository") OR (MM "Electronic Data Interchange") OR (MM "Public Reporting of Healthcare Data")
- 18 health portal?
- 19 (MM "Email")
- 20 (MM "Telephone+") OR (MM "Cellular Phone+")
- 21 (telephon\* or tele-phon\* or phone or phoned or phones or phoning or answering service? or telefacsimile\* or tele-facsimile\* or FAX)
- 22 (MM "Telephone Consultation (Iowa NIC)")
- 23 Television
- 24 (MM "Television")
- 25 (televis\* or tele-vis\* or TV or TVs or videorecord\* or video-record\* or videotap\* or video tap\*)

- 26 (MM "Videoconferencing")
- 27 (videoconferenc\* or video-conference\* or videophon\* or video-phon\*)
- 28 (MH "Electronic Health Records+")
- 29 (MM "Patient Record Systems") OR (MH "Medical Records, Personal") OR (MM "Electronic Data Interchange") OR (MH "Health Information Management Personnel") OR (MM "Medical Records")
- 30 (EHR or EHRs or EMR or EMRs or PHR or PHRs)
- 31 (MM "Telecommunications")
- 32 (telecommunicat\* or tele-communicat\*)
- 33 (MH "Telemedicine+") OR (MH "Telehealth+") OR (MM "Telerehabilitation")
- 34 (ehealth or e-health or mhealth or m-health or mobile health)
- 35 (MH "Telehealth+") OR (MM "Telemedicine") OR (MM "Telenursing") OR (MM "Telepsychiatry") OR (MH "Teledentistry")
- 36 "(telecare or tele-care or teleconsult\* or tele-consult\* or telecounsel\* or tele-counsel\* or telehome\* or tele-home\* or telemed\* or tele-med\* or telemonitor\* or tele-monitor\* or telenurs\* or tele-nurs\* or telepsychiatr\* or tele-psychiatr\* or telerehab\* or tele-rehab\*)"
- 37 "(telecare or tele-care or teleconsult\* or tele-consult\* or telecounsel\* or tele-counsel\* or telehome\* or tele-home\* or telemed\* or tele-med\* or telemonitor\* or tele-monitor\* or telenurs\* or tele-nurs\* or telepsychiatr\* or tele-psychiatr\* or telerehab\* or tele-rehab\*)"
- 38 S1 OR S2 OR S3 OR S4 OR S5 OR S6 OR S7 OR S8 OR S9 OR S10 OR S11 OR S12 OR S13 OR S14 OR S15 OR S16 OR S17 OR S18 OR S19 OR S20 OR S21 OR S22 OR S23 OR S24 OR S25 OR S26 OR S27 OR S28 OR S29 OR S30 OR S31 OR S32 OR S33 OR S34 OR S35 OR S36 OR S37
- 39 (MM "Medical Informatics")
- 40 (MH "Decision Making, Computer Assisted+") OR (MM "Diagnosis, Computer Assisted") OR (MM "Therapy, Computer Assisted") OR (MM "Data Analytics") OR (MM "Virtual Reality") OR (MM "Remote Access to Information") OR (MM "Artificial Intelligence")
- 41 S38 OR S39 OR S40
- 42 (MH "Health Personnel+") OR (MM "Allied Health Personnel") OR (MM "Alternative Health Personnel") OR (MM "Case Managers") OR (MM "Community Health Workers") OR (MM "Coroners and Medical Examiners") OR (MM "Expert Clinicians") OR (MM "Faculty, Nursing") OR (MM "Health Facility Administrators") OR (MM "Health Personnel, Infected") OR (MM "Health Personnel, Minority") OR (MM "Home Health Aides") OR (MM "Medical Staff") OR (MM "Midwives") OR (MM "Multiskilled Health Practitioners") OR (MM "Nurses") OR (MM "Nursing Home Personnel") OR (MM "Operating Room Personnel") OR (MM "Personal Trainers") OR (MM "Personnel, Health Facility") OR (MH "Pharmacists") OR (MM "Physicians") OR (MM "Podiatrists") OR (MM "Rapid Response Team") OR (MM "Registry Personnel") OR (MM "Rural Health Personnel") OR (MM "Transplant Coordinators") OR (MM "Information Technology Personnel")
- 43 (doctor\* or clinician\* or practitioner\* or health professional\* or health personnel or provider\* or physician\* or GP or GPs or nurs\* or allied health\* or psycholog\* or counsellor\* or counselor\* or social work\* or therapist\* or psychiatrist\* or emergency medical technician\* or paramedic\* or ambulance or ((healthcare or health care) N (worker\* or personnel)))

- 44 S42 OR S43
- 45 (MH "Specialties, Surgical+")
- 46 (MM "Specialties, Surgical") OR (MM "Gynecology") OR (MM "Neurosurgery") OR (MM "Obstetrics") OR (MM "Ophthalmology") OR (MM "Orthopedics") OR (MM "Surgery, Plastic") OR (MM "Thoracic Surgery") OR (MM "Traumatology")
- 47 (MH "Surgery, Operative+") OR (MH "Surgical Count Procedure")
- 48 (MM "Perioperative Care") OR (MM "Perioperative Care (Iowa NIC)") OR (MM "Perioperative Medicine")
- 49 (MM "Preoperative Care") OR (MM "Preoperative Period") OR (MM "Teaching: Preoperative (Iowa NIC)") OR (MM "Preoperative Education")
- 50 (MM "Postoperative Care") OR (MM "Postoperative Complications") OR (MM "Postoperative Pain")
- 51 (MM "Postoperative Period") OR (MM "Intraoperative Period")
- 52 S45 OR S46 OR S47 OR S48 OR S49 OR S50 OR S51
- 53 (MM "Semi-Structured Interview") OR (MM "Unstructured Interview") OR (MM "Structured Interview")
- 54 (("semi-structured" or semistructured or unstructured or informal or "in-depth" or indepth or "face-to-face" or structured or guide) N (interview\* or discussion\* or questionnaire\*))
- 55 (focus group\* or qualitative or ethnograph\* or fieldwork or "field work" or "key informant")
- 56 (MM "Fieldwork") OR (MM "Focus Groups")
- 57 (MH "Qualitative Studies+") OR (MM "Action Research") OR (MM "Phenomenological Research") OR (MM "Naturalistic Inquiry") OR (MM "Ethnonursing Research") OR (MM "Ethnographic Research")
- 58 interviews as topic/ or focus groups/ or narration/ or qualitative research/
- 59 (("semi-structured" or semistructured or unstructured or informal or "in-depth" or indepth or "face-to-face" or structured or guide or guides or follow up or self report) N (interview\* or discussion\* or questionnaire\*))
- 60 (focus group\* or advisory group\* or qualitative or ethnograph\* or fieldwork or field work or key informant or thematic analy\* or grounded theor\* or phenomenolog\* or discourse analy\* or content analy\* or narrative\* or observational method\* or open ended evaluation\* or action research or inductive analy\* or emic or etic or hermeneutic\* or constant compar\* or grounded theor\* or lived experience\* or life experience\* or theoretical sampl\* or purposive sampl\* or quasi-experiment\* or (case N stud\*))
- 61 S53 OR S54 OR S55 OR S56 OR S57 OR S58 OR S59 OR S60
- 62 S41 AND S44 AND S52 AND S61

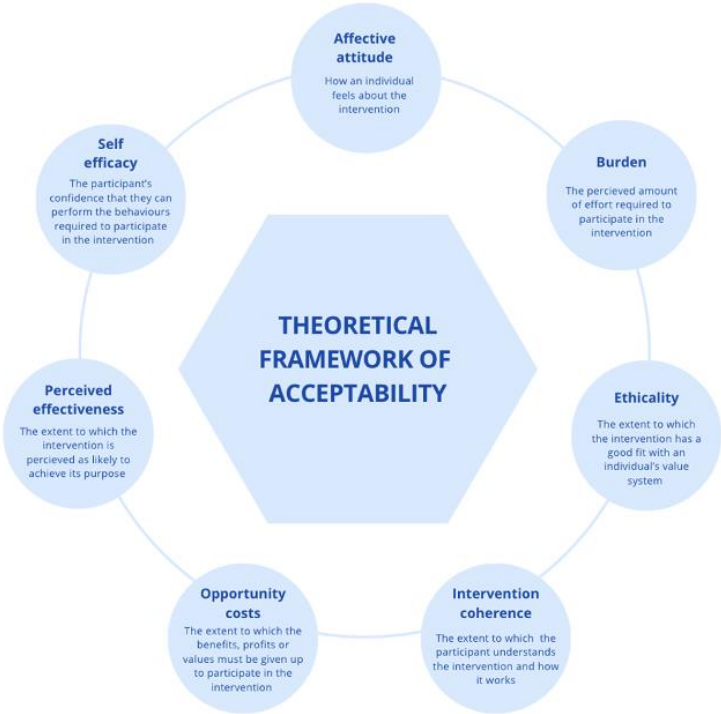

Supplementary figure 1: An illustration of the seven components of the TFA based on the model by Sekhon et al. [27]

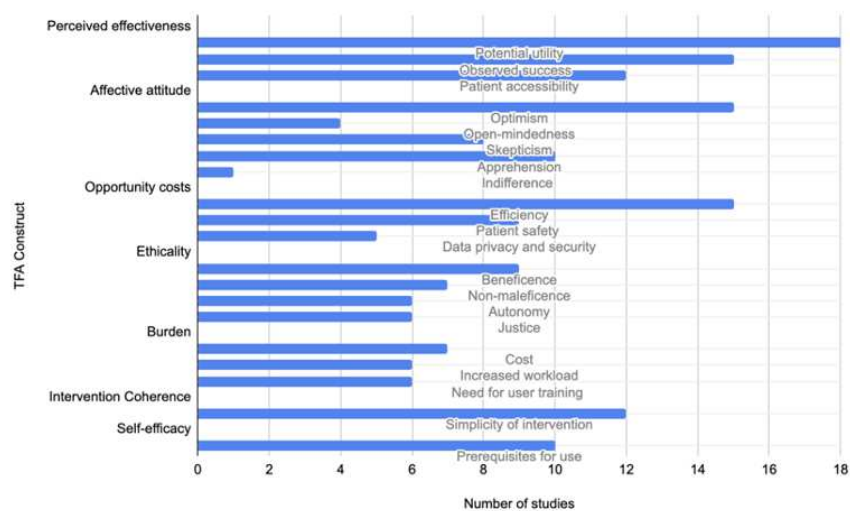

Supplementary figure 2: The frequency distribution of themes categorised by TFA construct across studies (n=18). Themes are displayed in grey below each bar.

| Specialty                  | Frequency of studies, n% |
|----------------------------|--------------------------|
| Orthopaedic surgery        | 4 (22.2)                 |
| General surgery            | 4 (22.2)                 |
| Colorectal surgery         | 3 (16.7)                 |
| Neurosurgery               | 2 (11.1)                 |
| Vascular surgery           | 1 (5.6)                  |
| Urology                    | 1 (5.6)                  |
| Plastic surgery            | 1 (5.6)                  |
| Cardiothoracic surgery     | 1 (5.6)                  |
| Anaesthesia                | 1 (5.6)                  |
| Otolaryngology             | 1 (5.6)                  |
| Obstetrics and gynaecology | 1 (5.6)                  |
| Neurology                  | 1 (5.6)                  |
| Geriatrics                 | 1(5.6)                   |

Supplementary table 1: Medical specialties represented across included publications (n=18)

ENTREQ Checklist

| No | Item                       | Guide and description                                                                                                                                                                                                                                                                                                                                                                                     | Completed | Location in document    |
|----|----------------------------|-----------------------------------------------------------------------------------------------------------------------------------------------------------------------------------------------------------------------------------------------------------------------------------------------------------------------------------------------------------------------------------------------------------|-----------|-------------------------|
| 1  | Aim                        | State the research question the synthesis addresses.                                                                                                                                                                                                                                                                                                                                                      | X         | Pg 5, lines 23-25       |
| 2  | Synthesis methodology      | Identify the synthesis methodology or theoretical framework which underpins the synthesis, and describe the rationale for choice of methodology (e.g., meta-ethnography, thematic synthesis, critical interpretive synthesis, grounded theory synthesis, realist synthesis, meta-aggregation, meta-study, framework synthesis).                                                                           | X         | Pg 5, lines 9-13, 21-15 |
| 3  | Approach to searching      | Indicate whether the search was pre-planned (comprehensive search strategies to seek all available studies) or iterative (to seek all available concepts until they theoretical saturation is achieved).                                                                                                                                                                                                  | X         | Pg 5, lines 28-35       |
| 4  | Inclusion criteria         | Specify the inclusion/exclusion criteria (e.g., in terms of population, language, year limits, type of publication, study type).                                                                                                                                                                                                                                                                          | X         | Pg 6, lines 1-10        |
| 5  | Data sources               | Describe the information sources used (e.g., electronic databases (MEDLINE, EMBASE, CINAHL, psycINFO, Econlit), grey literature databases (digital thesis, policy reports), relevant organisational websites, experts, information specialists, generic web searches (Google Scholar) hand searching, reference lists) and when the searches conducted; provide the rationale for using the data sources. | X         | Pg 5, lines 31-32       |
| 6  | Electronic Search strategy | Describe the literature search (e.g. provide electronic search strategies with population terms, clinical or health topic terms, experiential or social phenomena related terms, filters for qualitative research, and search limits).                                                                                                                                                                    | X         | Appendix                |
| 7  | Study screening methods    | Describe the process of study screening and sifting (e.g. title, abstract and full text review, number of independent reviewers who screened studies).                                                                                                                                                                                                                                                    | X         | Pg 6, lines 12-19       |
| 8  | Study characteristics      | Present the characteristics of the included studies (e.g. year of publication, country, population, number of participants, data collection, methodology, analysis, research questions).                                                                                                                                                                                                                  | X         | Table 1                 |

|    |                         |                                                                                                                                                                                                                                                                                                                                                                                          |   |                          |
|----|-------------------------|------------------------------------------------------------------------------------------------------------------------------------------------------------------------------------------------------------------------------------------------------------------------------------------------------------------------------------------------------------------------------------------|---|--------------------------|
| 9  | Study selection results | Identify the number of studies screened and provide reasons for study exclusion (e.g. for comprehensive searching, provide numbers of studies screened and reasons for exclusion indicated in a figure/flowchart; for iterative searching describe reasons for study exclusion and inclusion based on modifications to the research question and/or contribution to theory development). | X | Figure 3                 |
| 10 | Rationale for appraisal | Describe the rationale and approach used to appraise the included studies or selected findings (e.g. assessment of conduct (validity and robustness), assessment of reporting (transparency), assessment of content and utility of the findings).                                                                                                                                        | X | Pg 7, lines 3-16         |
| 11 | Appraisal items         | State the tools, frameworks and criteria used to appraise the studies or selected findings (e.g. Existing tools: CASP, QARI, COREQ, Mays and Pope [25]; reviewer developed tools; describe the domains assessed: research team, study design, data analysis and interpretations, reporting).                                                                                             | X | Pg 7, lines 3-12         |
| 12 | Appraisal process       | Indicate whether the appraisal was conducted independently by more than one reviewer and if consensus was required.                                                                                                                                                                                                                                                                      | X | Pg 7, lines 14-16        |
| 13 | Appraisal results       | Present results of the quality assessment and indicate which articles, if any, were weighted/excluded based on the assessment and give the rationale.                                                                                                                                                                                                                                    | X | Figure 2                 |
| 14 | Data extraction         | Indicate which sections of the primary studies were analysed and how were the data extracted from the primary studies? (e.g. all text under the headings "results /conclusions" were extracted electronically and entered into a computer software).                                                                                                                                     | X | Pg 6, lines 21-22, 24-25 |
| 15 | Software                | State the computer software used, if any.                                                                                                                                                                                                                                                                                                                                                | X | Pg 6, lines 22, 24       |
| 16 | Number of reviewers     | Identify who was involved in coding and analysis.                                                                                                                                                                                                                                                                                                                                        | X | Pg 6, lines 24-31        |
| 17 | Coding                  | Describe the process for coding of data (e.g. line by line coding to search for concepts).                                                                                                                                                                                                                                                                                               | X | Pg 6, lines 26-27        |

|    |                      |                                                                                                                                                                                                                               |   |                               |
|----|----------------------|-------------------------------------------------------------------------------------------------------------------------------------------------------------------------------------------------------------------------------|---|-------------------------------|
| 18 | Study comparison     | Describe how were comparisons made within and across studies (e.g. subsequent studies were coded into pre-existing concepts, and new concepts were created when deemed necessary).                                            | X | Pg 6, lines 26-28             |
| 19 | Derivation of themes | Explain whether the process of deriving the themes or constructs was inductive or deductive.                                                                                                                                  | X | Pg 6, lines 26-28             |
| 20 | Quotations           | Provide quotations from the primary studies to illustrate themes/constructs, and identify whether the quotations were participant quotations of the author's interpretation.                                                  | X | Table 2                       |
| 21 | Synthesis output     | Present rich, compelling and useful results that go beyond a summary of the primary studies (e.g. new interpretation, models of evidence, conceptual models, analytical framework, development of a new theory or construct). | X | Pg 8, line 1 - Pg 13, line 12 |

Adapted from Tong A, Flemming K, McInnes E, Oliver S, Craig J (2012). Enhancing transparency in reporting the synthesis of qualitative research: ENTREQ. BMC Medical Research Methodology. 12(1):181. doi: 10.1186/1471-2288-12-181

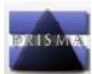

## PRISMA 2020 Checklist

| Section and Topic             | Item # | Checklist item                                                                                                                                                                                                                                                                                       | Location where item is reported |
|-------------------------------|--------|------------------------------------------------------------------------------------------------------------------------------------------------------------------------------------------------------------------------------------------------------------------------------------------------------|---------------------------------|
| <b>TITLE</b>                  |        |                                                                                                                                                                                                                                                                                                      |                                 |
| Title                         | 1      | Identify the report as a systematic review.                                                                                                                                                                                                                                                          | 1                               |
| <b>ABSTRACT</b>               |        |                                                                                                                                                                                                                                                                                                      |                                 |
| Abstract                      | 2      | See the PRISMA 2020 for Abstracts checklist.                                                                                                                                                                                                                                                         | 2                               |
| <b>INTRODUCTION</b>           |        |                                                                                                                                                                                                                                                                                                      |                                 |
| Rationale                     | 3      | Describe the rationale for the review in the context of existing knowledge.                                                                                                                                                                                                                          | 4,5                             |
| Objectives                    | 4      | Provide an explicit statement of the objective(s) or question(s) the review addresses.                                                                                                                                                                                                               | 5                               |
| <b>METHODS</b>                |        |                                                                                                                                                                                                                                                                                                      |                                 |
| Eligibility criteria          | 5      | Specify the inclusion and exclusion criteria for the review and how studies were grouped for the syntheses.                                                                                                                                                                                          | 5                               |
| Information sources           | 6      | Specify all databases, registers, websites, organisations, reference lists and other sources searched or consulted to identify studies. Specify the date when each source was last searched or consulted.                                                                                            | 5                               |
| Search strategy               | 7      | Present the full search strategies for all databases, registers and websites, including any filters and limits used.                                                                                                                                                                                 | Appendix 1                      |
| Selection process             | 8      | Specify the methods used to decide whether a study met the inclusion criteria of the review, including how many reviewers screened each record and each report retrieved, whether they worked independently, and if applicable, details of automation tools used in the process.                     | 6                               |
| Data collection process       | 9      | Specify the methods used to collect data from reports, including how many reviewers collected data from each report, whether they worked independently, any processes for obtaining or confirming data from study investigators, and if applicable, details of automation tools used in the process. | 6                               |
| Data items                    | 10a    | List and define all outcomes for which data were sought. Specify whether all results that were compatible with each outcome domain in each study were sought (e.g. for all measures, time points, analyses), and if not, the methods used to decide which results to collect.                        | 6                               |
|                               | 10b    | List and define all other variables for which data were sought (e.g. participant and intervention characteristics, funding sources). Describe any assumptions made about any missing or unclear information.                                                                                         | 6                               |
| Study risk of bias assessment | 11     | Specify the methods used to assess risk of bias in the included studies, including details of the tool(s) used, how many reviewers assessed each study and whether they worked independently, and if applicable, details of automation tools used in the process.                                    | 7                               |
| Effect measures               | 12     | Specify for each outcome the effect measure(s) (e.g. risk ratio, mean difference) used in the synthesis or presentation of results.                                                                                                                                                                  | N/A                             |
| Synthesis methods             | 13a    | Describe the processes used to decide which studies were eligible for each synthesis (e.g. tabulating the study intervention characteristics and comparing against the planned groups for each synthesis (item #5)).                                                                                 | N/A                             |
|                               | 13b    | Describe any methods required to prepare the data for presentation or synthesis, such as handling of missing summary statistics, or data conversions.                                                                                                                                                | N/A                             |
|                               | 13c    | Describe any methods used to tabulate or visually display results of individual studies and syntheses.                                                                                                                                                                                               | N/A                             |
|                               | 13d    | Describe any methods used to synthesize results and provide a rationale for the choice(s). If meta-analysis was performed, describe the model(s), method(s) to identify the presence and extent of statistical heterogeneity, and software package(s) used.                                          | 6                               |
|                               | 13e    | Describe any methods used to explore possible causes of heterogeneity among study results (e.g. subgroup analysis, meta-regression).                                                                                                                                                                 | N/A                             |
|                               | 13f    | Describe any sensitivity analyses conducted to assess robustness of the synthesized results.                                                                                                                                                                                                         | N/A                             |
| Reporting bias assessment     | 14     | Describe any methods used to assess risk of bias due to missing results in a synthesis (arising from reporting biases).                                                                                                                                                                              | N/A                             |
| Certainty assessment          | 15     | Describe any methods used to assess certainty (or confidence) in the body of evidence for an outcome.                                                                                                                                                                                                | N/A                             |

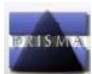

## PRISMA 2020 Checklist

| Section and Topic                              | Item # | Checklist item                                                                                                                                                                                                                                                                       | Location where item is reported |
|------------------------------------------------|--------|--------------------------------------------------------------------------------------------------------------------------------------------------------------------------------------------------------------------------------------------------------------------------------------|---------------------------------|
| <b>RESULTS</b>                                 |        |                                                                                                                                                                                                                                                                                      |                                 |
| Study selection                                | 16a    | Describe the results of the search and selection process, from the number of records identified in the search to the number of studies included in the review, ideally using a flow diagram.                                                                                         | 7, Figure 2                     |
|                                                | 16b    | Cite studies that might appear to meet the inclusion criteria, but which were excluded, and explain why they were excluded.                                                                                                                                                          | N/A                             |
| Study characteristics                          | 17     | Cite each included study and present its characteristics.                                                                                                                                                                                                                            | 7, Table 1                      |
| Risk of bias in studies                        | 18     | Present assessments of risk of bias for each included study.                                                                                                                                                                                                                         | 7, Figure 1                     |
| Results of individual studies                  | 19     | For all outcomes, present, for each study: (a) summary statistics for each group (where appropriate) and (b) an effect estimate and its precision (e.g. confidence/credible interval), ideally using structured tables or plots.                                                     | N/A                             |
| Results of syntheses                           | 20a    | For each synthesis, briefly summarise the characteristics and risk of bias among contributing studies.                                                                                                                                                                               | 7, Figure 1                     |
|                                                | 20b    | Present results of all statistical syntheses conducted. If meta-analysis was done, present for each the summary estimate and its precision (e.g. confidence/credible interval) and measures of statistical heterogeneity. If comparing groups, describe the direction of the effect. | 7-13                            |
|                                                | 20c    | Present results of all investigations of possible causes of heterogeneity among study results.                                                                                                                                                                                       | N/A                             |
|                                                | 20d    | Present results of all sensitivity analyses conducted to assess the robustness of the synthesized results.                                                                                                                                                                           | N/A                             |
| Reporting biases                               | 21     | Present assessments of risk of bias due to missing results (arising from reporting biases) for each synthesis assessed.                                                                                                                                                              | N/A                             |
| Certainty of evidence                          | 22     | Present assessments of certainty (or confidence) in the body of evidence for each outcome assessed.                                                                                                                                                                                  | N/A                             |
| <b>DISCUSSION</b>                              |        |                                                                                                                                                                                                                                                                                      |                                 |
| Discussion                                     | 23a    | Provide a general interpretation of the results in the context of other evidence.                                                                                                                                                                                                    | 13-15                           |
|                                                | 23b    | Discuss any limitations of the evidence included in the review.                                                                                                                                                                                                                      | 15                              |
|                                                | 23c    | Discuss any limitations of the review processes used.                                                                                                                                                                                                                                | 15,16                           |
|                                                | 23d    | Discuss implications of the results for practice, policy, and future research.                                                                                                                                                                                                       | 15,16                           |
| <b>OTHER INFORMATION</b>                       |        |                                                                                                                                                                                                                                                                                      |                                 |
| Registration and protocol                      | 24a    | Provide registration information for the review, including register name and registration number, or state that the review was not registered.                                                                                                                                       | 5                               |
|                                                | 24b    | Indicate where the review protocol can be accessed, or state that a protocol was not prepared.                                                                                                                                                                                       | 5                               |
|                                                | 24c    | Describe and explain any amendments to information provided at registration or in the protocol.                                                                                                                                                                                      | N/A                             |
| Support                                        | 25     | Describe sources of financial or non-financial support for the review, and the role of the funders or sponsors in the review.                                                                                                                                                        | 3                               |
| Competing interests                            | 26     | Declare any competing interests of review authors.                                                                                                                                                                                                                                   | 3                               |
| Availability of data, code and other materials | 27     | Report which of the following are publicly available and where they can be found: template data collection forms; data extracted from included studies; data used for all analyses; analytic code; any other materials used in the review.                                           | 16                              |

From: Page MJ, McKenzie JE, Bossuyt PM, Boutron I, Hoffmann TC, Mulrow CD, et al. The PRISMA 2020 statement: an updated guideline for reporting systematic reviews. *BMJ* 2021;372:n71. doi: 10.1136/bmj.n71

For more information, visit: <http://www.prisma-statement.org/>
